# Supplementary material for: Destabilized SMC5/6 complex leads to chromosome breakage syndrome with severe lung disease
Source: JCI journal article supplement (doi:10.1172/jci82890), 2016-07-17
Supplement: sd1 [file 1]

301 Moved Permanently

# Moved Permanently

The document has moved here.
